# Supplementary material for: Increasing Salt Marsh Elevation Using Sediment Augmentation: Critical Insights from Surface Sediments and Sediment Cores
Source: Springer Nature journal article supplement (doi:10.1007/s00267-023-01897-8), 2023-11-01

# Bacon Age-Depth Models for Sediment Cores

a) SB15-06

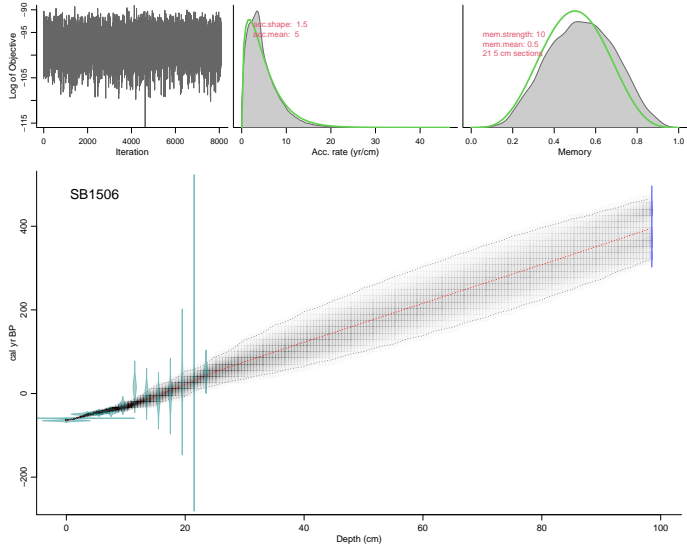

b) SB15-09

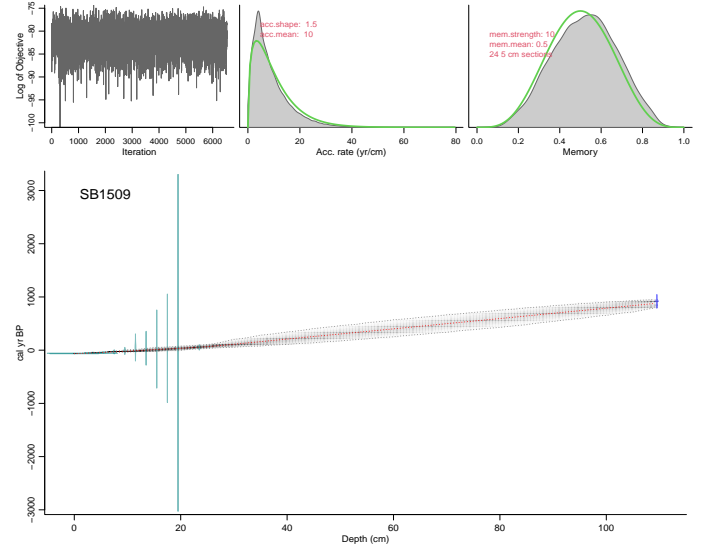

c) SB15-11

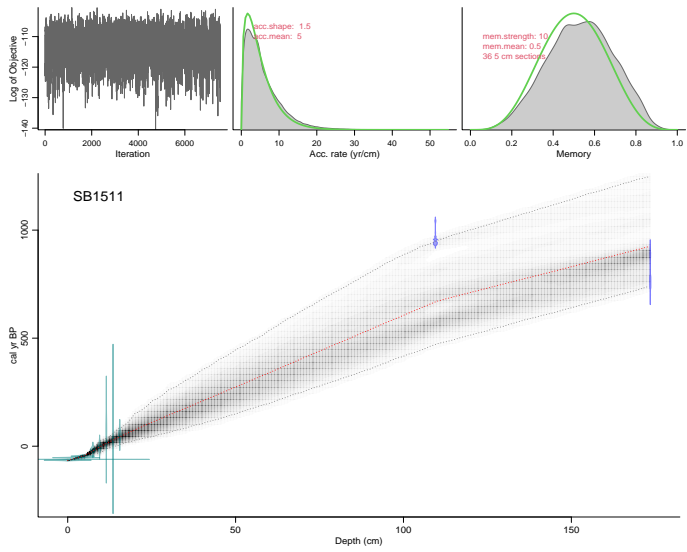

d) SB15-16

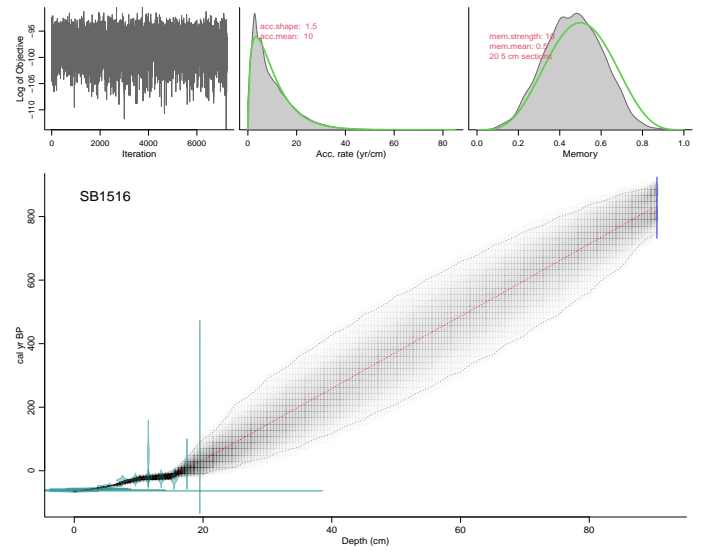

e) SB15-20

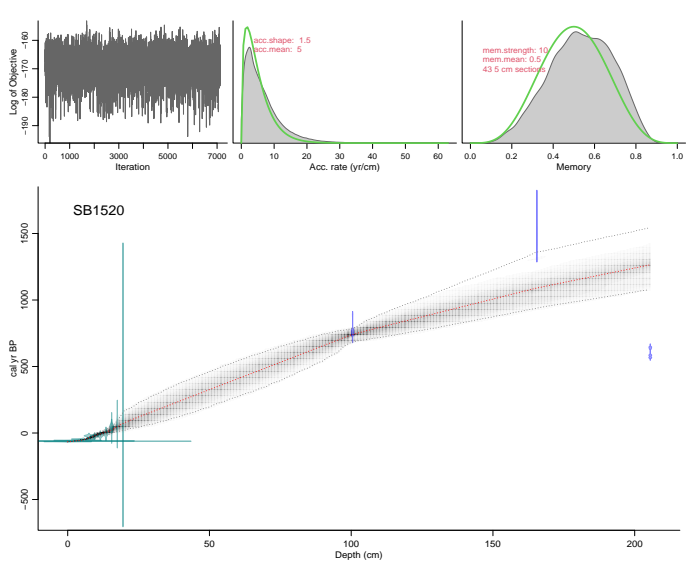

f) SB15-21

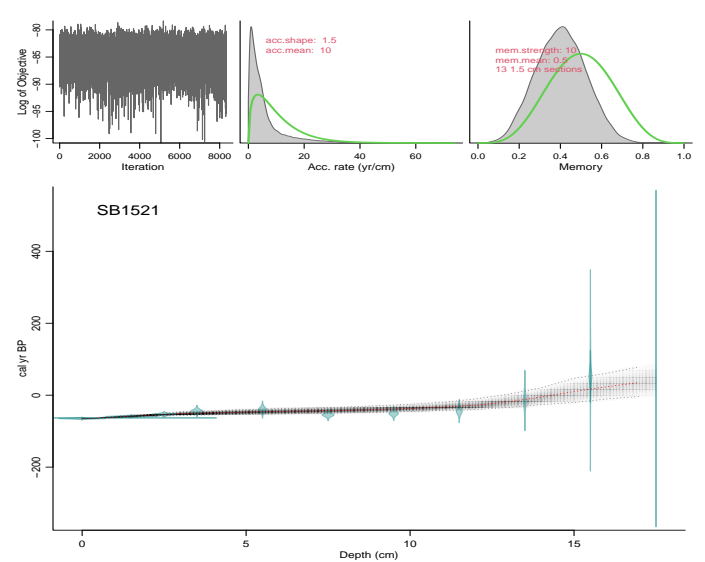

Supplement: MOESM1 [file 26253472]
